# Supplementary material
Source: Springer Nature journal article supplement (https://www.springermedizin.de/resource/supplementary/13223_2011_307_MOESM1_ESM.pdf/9597518)

A.

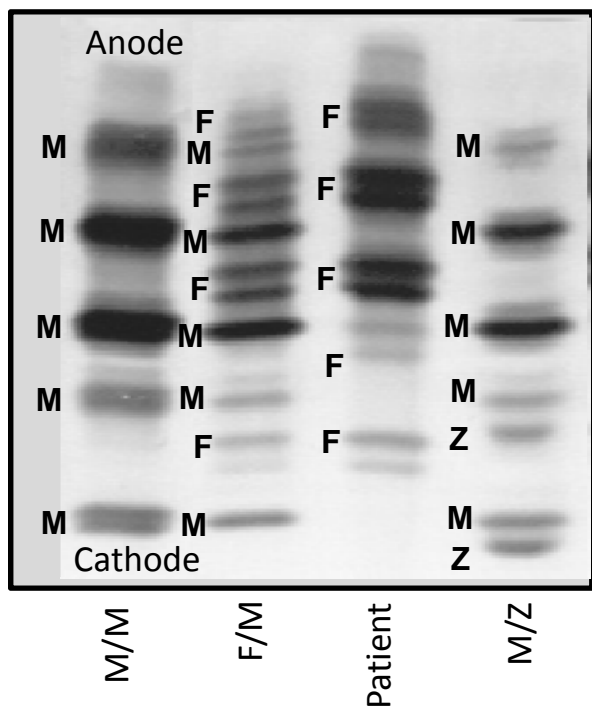

B.

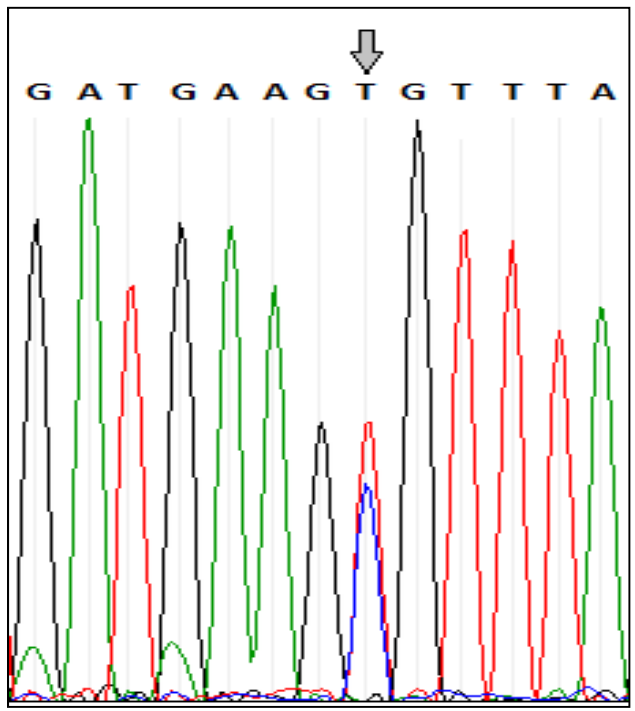

C.

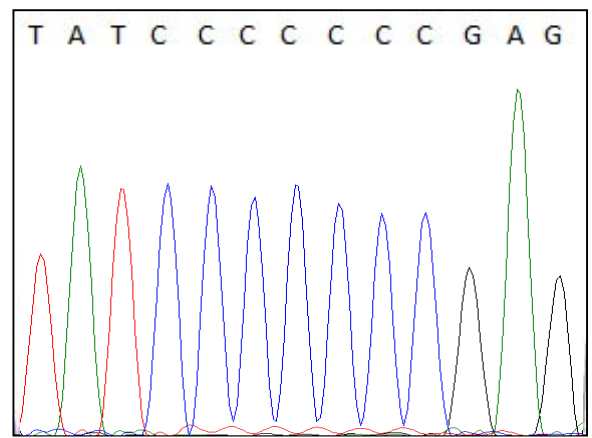

D.

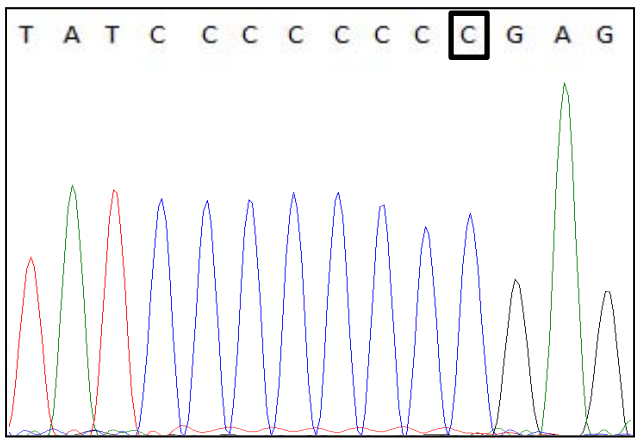

Supplement: MOESM1 [file 9597518]
